# Supplementary material
Source: publisher site journal article supplement (https://www.dovepress.com/article/249357)
Supplement: Supplementary file 1 [file get_supplementary_file.php]

**Table S1.** PCR Primers for multi-locus sequence typing (MLST)

| Genes | Primers | Sequence（5'-3'） | Size（bp） |
| --- | --- | --- | --- |
| *aroC* | aroC-F | CCTGGCACCTCGCGCTATAC | 826 |
| aroC-R | CCACACACGGATCGTGGCG |
| *dnaN* | dnaN-F | ATGAAATTTACCGTTGAACGTGA | 833 |
| dnaN-R | AATTTCTCATTCGAGAGGATTGC |
| *hemD* | hemD-F | ATGAGTATTCTGATCACCCG | 666 |
| hemD-R | ATCAGCGACCTTAATATCTTGCCA |
| *hisD* | hisD-F | GAAACGTTCCATTCCGCGCAGAC | 894 |
| hisD-R | CTGAACGGTCATCCGTTTCTG |
| *purE* | purE-F | ATGTCTTCCCGCAATAATCC | 510 |
| purE-R | TCATAGCGTCCCCCGCGGATC |
| *sucA* | sucA-F | AGCACCGAAGAGAAACGCTG | 643 |
| sucA-R | GGTTGTTGATAACGATACGTAC |
| *thrA* | thrA-F | GTCACGGTGATCGATCCGGT | 852 |
| thrA-R | CACGATATTGATATTAGCCCG |

F, forward primer; R, reverse primer;

**Table S2.** PCR Primers for DNA hybridization and identity of *bla*NDM5 gene

| Primers | Sequence (5'-3') | Tm (℃) | Size (bp) |
| --- | --- | --- | --- |
| Hyb-*blaNDM5*-F | GGCGGAATGGCTCATCACGA | 54 | 287 |
| Hyb-*blaNDM5*-R | CGCAACACAGCCTGACTTTC |
| Test-*blaNDM5*-F | TCAGCGCAGCTTGTCGGC | 55 | 813 |
| Test-*blaNDM5*-R | ATGGAATTGCCCAATATTATGCACCC |

Hyb, DNA Hybridization; Test, identity of NDM variants; F, forward primer; R, reverse primer; Tm, Melting Temperature
